# Supplementary material for: A supra-molecular switchable dielectric material with non-linear optical properties
Source: Royal Society of Chemistry journal article supplement (doi:10.1039/c6tc05574e), 2017-01-01
Supplement: c6tc05574e1.pdf [file c6tc05574e1.pdf]

## Supporting Information

### Supra-Molecular Switchable Dielectric Material with Non-Linear Optical Property

Tariq Khan, Muhammad Adnan Asghar, Zihua Sun,\* Aurang Zeb, Chengmin Ji, and

Junhua Luo\*

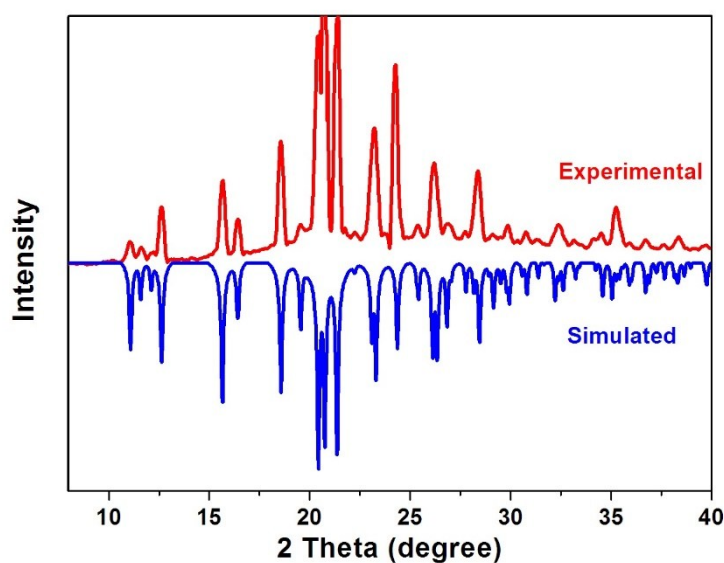

**Fig. S1.** Experimental and simulated X-ray powder diffraction patterns of **1** at room temperature.

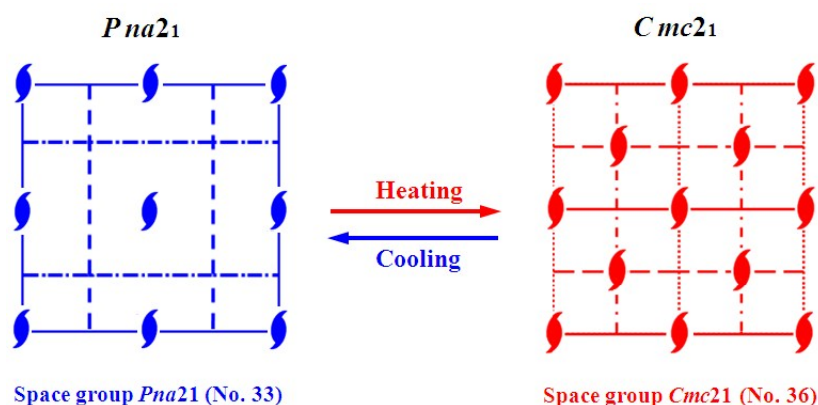

**Fig. S2.** Symmetry transformation of space group from *Cmc21* (HTP) to *Pna21* (LTP, equivalent to *Pn21a*) in **1**.

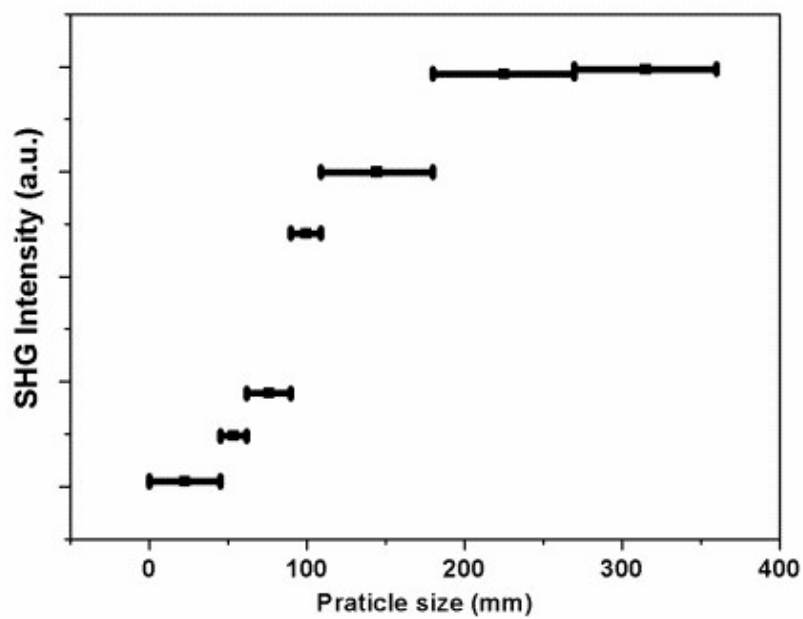

Fig. S3. SHG intensity versus particle size curves measured at 1064 nm.

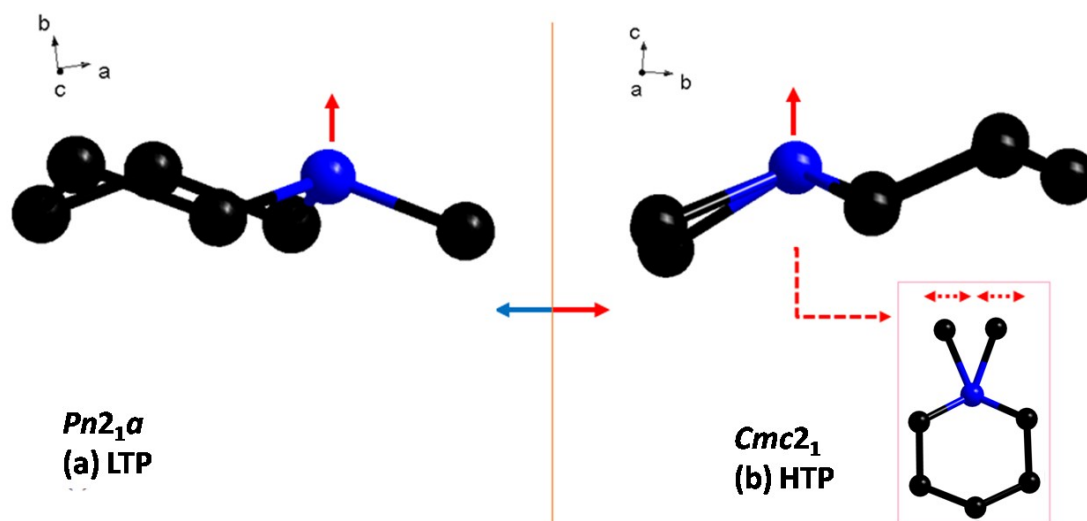

Fig. S4. The pictorial representation of cation at (a) LTP (b) HTP.

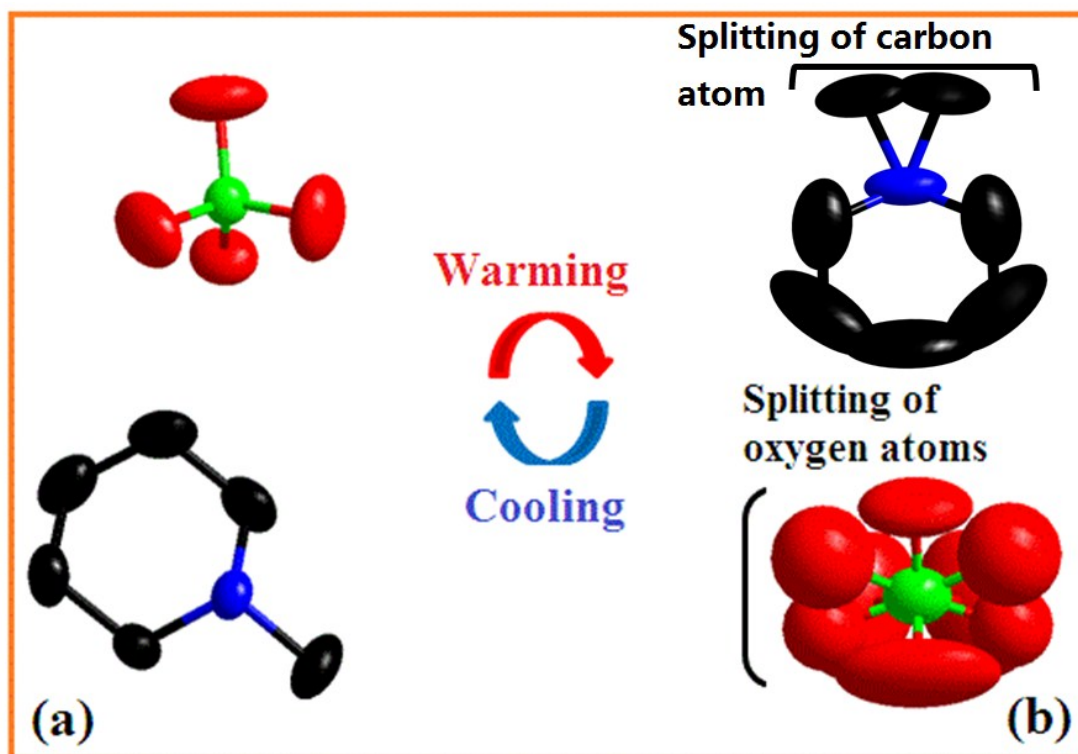

**Fig. S5.** Thermal ellipsoid of selected moieties of **1** at LTP (a) and (b) HTP. Hydrogen atoms are omitted for clarity.

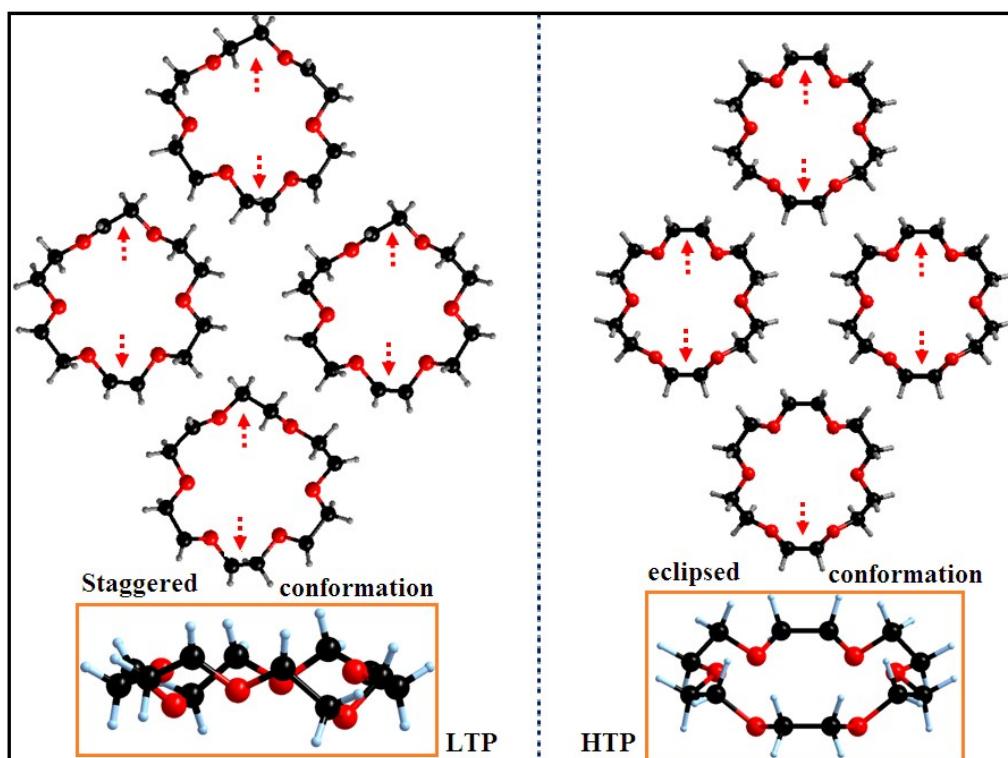

**Fig. S6.** Structure diagram of crown-ether in **1**. The pictorial representations show the staggered and eclipsed conformer at LTP and HTP, respectively.

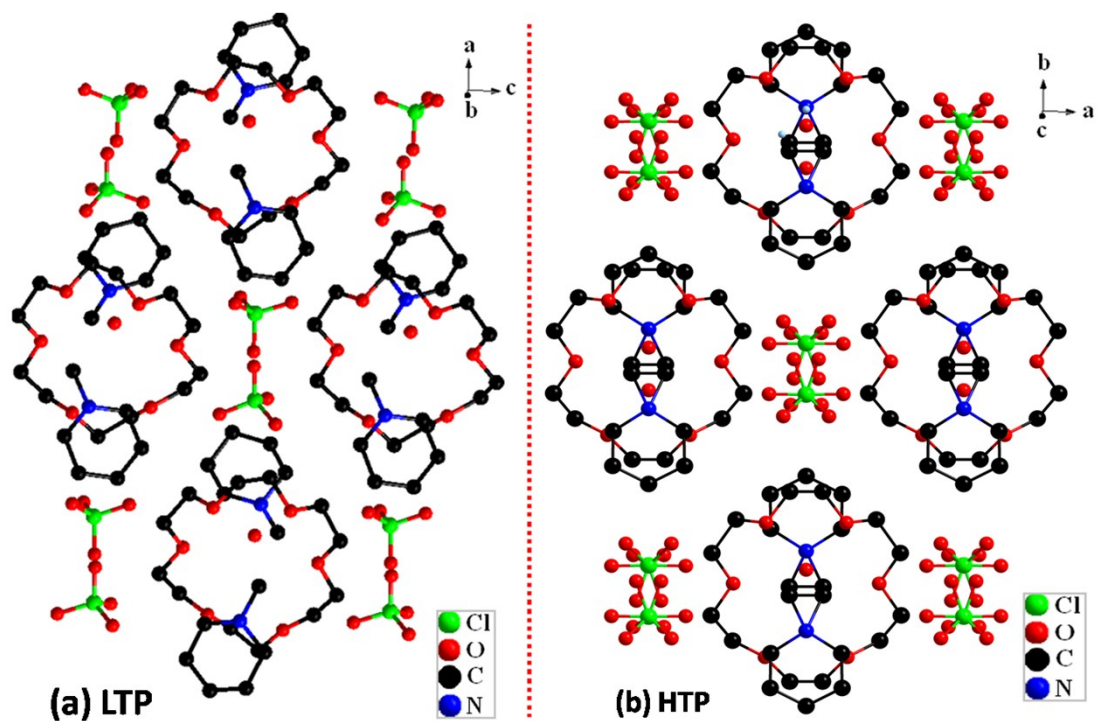

**Fig. S7.** Packing diagram of **1** at (a) LTP and (b) HTP. Hydrogen atoms are omitted for clarity.

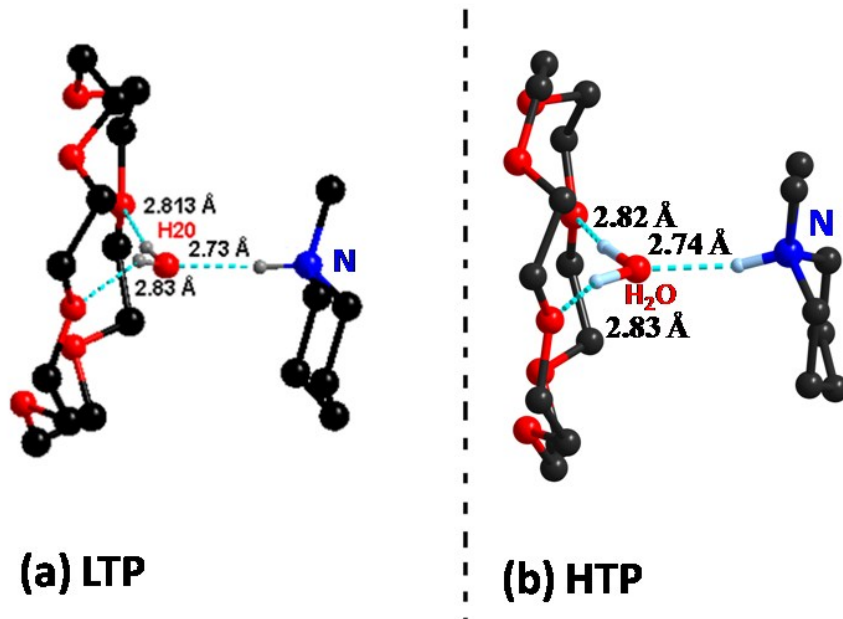

Fig. S8. Hydrogen bonding interactions in the complex cation of **1** at (a) LTP and (b) HTP.

**Table S1.** Crystal data and structure refinement details of **1** at 285 and 220 K.

|                                                                                            |                                                               |                                                               |
|--------------------------------------------------------------------------------------------|---------------------------------------------------------------|---------------------------------------------------------------|
| Sum formula                                                                                | C <sub>18</sub> H <sub>40</sub> ClNO <sub>11</sub>            | C <sub>18</sub> H <sub>40</sub> ClNO <sub>11</sub>            |
| Formula weight                                                                             | 481.96                                                        | 481.96                                                        |
| Temperature (K)                                                                            | 285                                                           | 220                                                           |
| Crystal system                                                                             | Orthorhombic                                                  | Orthorhombic                                                  |
| Space group                                                                                | <i>Cmc2<sub>1</sub></i>                                       | <i>Pn2<sub>1</sub>a</i>                                       |
| <i>a</i> /Å                                                                                | 10.8029(4)                                                    | 31.3826(3)                                                    |
| <i>b</i> /Å                                                                                | 15.9579(5)                                                    | 14.50650(10)                                                  |
| <i>c</i> /Å                                                                                | 14.6015(3)                                                    | 10.79330(10)                                                  |
| $\alpha$ / deg                                                                             | 90.0                                                          | 90.0                                                          |
| $\beta$ / deg                                                                              | 90.0                                                          | 90.0                                                          |
| $\gamma$ / deg                                                                             | 90.0                                                          | 90.0                                                          |
| Volume (Å <sup>3</sup> )                                                                   | 2517.18(13)                                                   | 4913.67(7)                                                    |
| <i>Z</i>                                                                                   | 4                                                             | 4                                                             |
| <i>D</i> <sub>calcd</sub> , g cm <sup>-3</sup>                                             | 1.272                                                         | 1.303                                                         |
| <i>F</i> (000)                                                                             | 1040                                                          | 2080                                                          |
| <i>wR</i> <sub>2</sub> (on <i>F</i> <sub>o</sub> <sup>2</sup> , <i>I</i> > 2σ( <i>I</i> )) | 0.1813( 1799)                                                 | 0.1532 ( 7264)                                                |
| Goodness-of-fit on <i>F</i> <sup>2</sup>                                                   | <i>S</i> = 1.070                                              | 1.049                                                         |
| Completeness (%)                                                                           | 99.4                                                          | 98.1                                                          |
| <i>T</i> <sub>min</sub> / <i>T</i> <sub>max</sub>                                          | 0.543,0.517                                                   | 0.555/0.529                                                   |
| <i>R</i> indices [ <i>I</i> > 2σ( <i>I</i> )]                                              | <i>R</i> <sub>1</sub> =0.0674; <i>wR</i> <sub>2</sub> =0.1813 | <i>R</i> <sub>1</sub> =0.0543; <i>wR</i> <sub>2</sub> =0.1532 |
| <i>R</i> indices (all data)                                                                | <i>R</i> <sub>1</sub> =0.0731; <i>wR</i> <sub>2</sub> =0.1900 | <i>R</i> <sub>1</sub> =0.0573; <i>wR</i> <sub>2</sub> =0.1567 |

$$\alpha R_1 = \sum | |F_o| - |F_c| | / \sum |F_o|, \quad wR_2 = [\sum (|F_o|^2 - |F_c|^2) / \sum |F_o|^2]^{1/2}$$
